# Supplementary material
Source: PubMed Central journal article supplement (PMC9434486)
Supplement: jamadermatol-e222319-s001.pdf [file jamadermatol-e222319-s001.pdf]

## Supplemental Online Content

Basmanav FB, Cesarato N, Kumar S, et al. Assessment of the genetic spectrum of uncombable hair syndrome in a cohort of 107 individuals. *JAMA Dermatol*. Published online August 31, 2022. doi:10.1001/jamadermatol.2022.2319

**eMethods.** Whole-exome sequencing and haplotype analysis

**eFigure 1.** Clinical manifestation of UHS in additional individuals and the respective underlying genotypes

**eFigure 2.** 3-Dimensional protein modeling of the pathogenic stop and frameshift variants identified in *PADI3*

**eFigure 3.** 3-Dimensional protein modeling of the three most common *PADI3* variants

**eFigure 4.** Genetic screening of two pedigrees suggesting an autosomal dominant inheritance

**eFigure 5.** The variable extent of sharing across haplotypes carrying the respective *PADI3* pathogenic variants

**eTable 1.** Pathogenic *PADI3* variants underlying UHS

**eTable 2.** The variable extent of sharing across individual haplotypes carrying c.505C>T (p.Gln169\*)

**eTable 3.** The variable extent of sharing across individual haplotypes carrying c.335T>A (p.Leu112His)

**eTable 4.** The variable extent of sharing across individual haplotypes carrying c.881C>T (p.Ala294Val)

**eTable 5.** The variable extent of sharing across individual haplotypes carrying c.1813C>A (p.Pro605Thr)

### eReferences

This supplemental material has been provided by the authors to give readers additional information about their work.

## eMethods. Whole-exome sequencing and haplotype analysis

For whole-exome sequencing, we fragmented 1 µg of DNA with sonication technology (Bioruptor, diagenode, Liège, Belgium). The fragments were end-repaired and adaptor-ligated, including incorporation of sample index barcodes. After size selection and pooling, we subjected all libraries to an enrichment process with the SureSelect Human All Exon V6 or V7 kits following manufacturer's procedures (Agilent, Santa Clara, CA, USA). The final libraries were sequenced on an Illumina HiSeq 4000 or an NovaSeq 6000 sequencing instrument (Illumina, San Diego, CA, USA) with a paired-end 2×75 bp or 2x101 bp protocol. The reads were then mapped to the Genome Reference Consortium human genome build 38 (UCSC version hg20) using the Burrows-Wheeler Alignment tool (BWA-mem) (unpublished data, H.L.). The 30X coverage reached 68 - 88% of the target sequences. The Genome Analysis Toolkit (GATK) v.3.8<sup>1</sup> was used to mark duplicated reads, perform local realignment around short insertions and deletions (INDELs), recalibrate the base quality scores, and call SNVs and INDELs. Samtools v.1.6<sup>2</sup> and Platypus v.0.8.1<sup>3</sup> were used as independent short read variation caller. The Varbank2 pipeline v.3.3/v.3.10/v.3.14 and interface, which were developed in-house at the Cologne Center for Genomics, were used for data analysis and filtering (<https://varbank.ccg.uni-koeln.de/varbank2>, unpublished data, H.T., J.A., and P.N.). All variation calls were filtered for rare, high-quality variants in either a homozygous (AF>0.75) or heterozygous (AF>0.25) state that were predicted to modify a protein sequence or impair splicing. Criteria used to determine high quality GATK UnifiedGenotyper calls were for SNVs: passed VQSR filter, QD>5; MQ>50; FS<40; MQRankSum>-5; ReadPosRankSum>-5 and for INDELs: passed VQSR filter; QD>4; FS<100; ReadPosRankSum>-5. Platypus and Mpileup calls were filtered for QD>5 and MQ>50. Rare variant status was assigned on the basis of an MAF of ≤ 0.01, according to the highest value in any given population of an in-house GRCh38 lifted version of the gnomAD v.2.1 database<sup>4</sup>.

Genotyping for haplotype analysis was carried out using GSAMD24v2-0 chips (Illumina) according to manufacturer's instructions (Infinium HTS Assay protocol, Illumina). Phasing of the samples genotypes was performed with Eagle 2.4.1<sup>5</sup> using 1000 Genomes Phase 3 data<sup>6</sup> as a reference panel. Haplotypes were reconstructed in a 10 megabase region around *PADI3* on chromosome 1. Of the 40 individuals, 16 were carriers for a pair of the four analyzed variants, 11 were homozygous carriers for one of the variants and 13 carried one of the four variants in heterozygosity (either unaffected parents or affected individuals carrying an additional *PADI3* pathogenic variant that was not assessed by haplotype analysis). In detail, haplotypes of 22 individuals (of whom 2 were homozygous carriers) were analyzed for c.335T>A (p.Leu112His), haplotypes of 26 individuals (of whom 8 were homozygous carriers) were analyzed for c.881C>T (p.Ala294Val), haplotypes of 4 heterozygous variant carriers were analyzed for c.1813C>A (p.Pro605Thr), and haplotypes of two individuals (of whom one was a homozygous carrier) were analyzed for c.505C>T (p.Gln169\*).

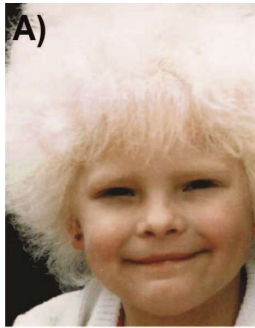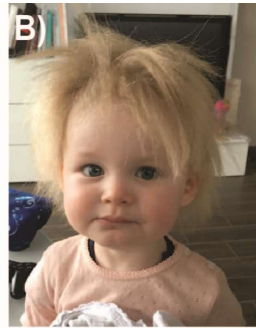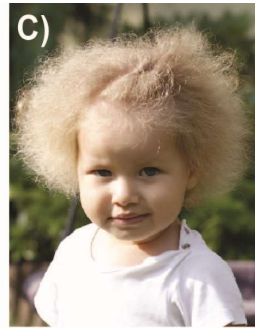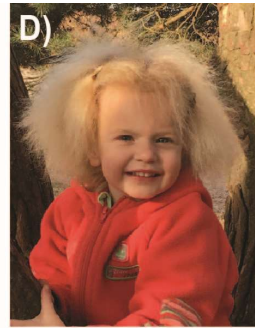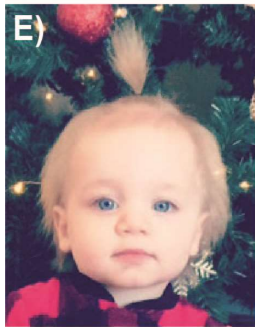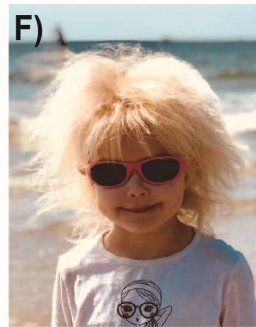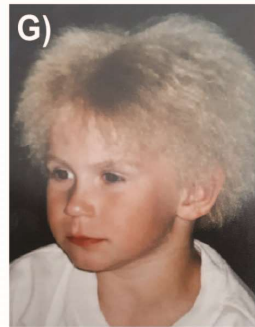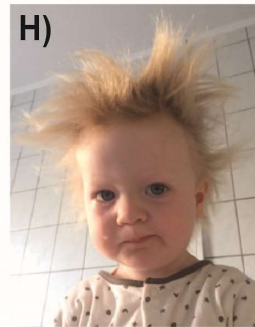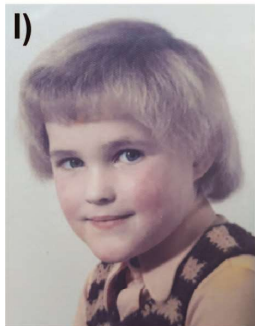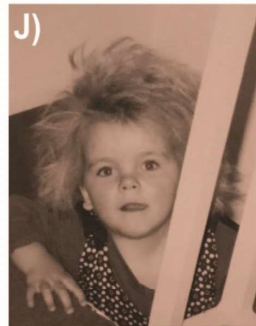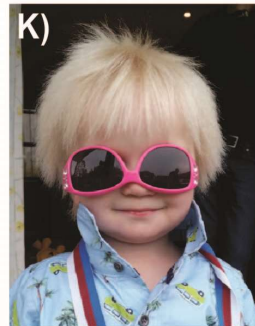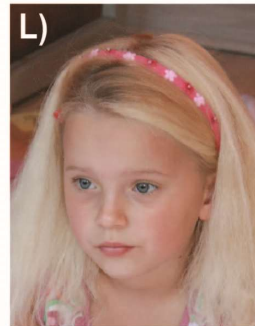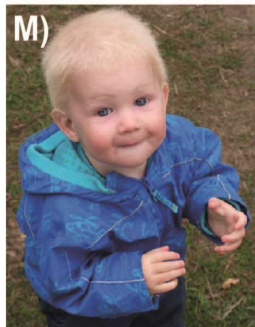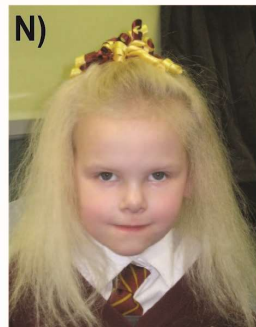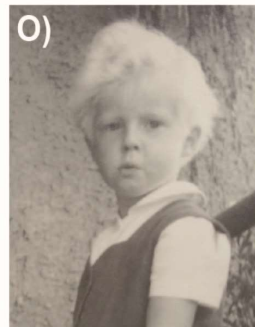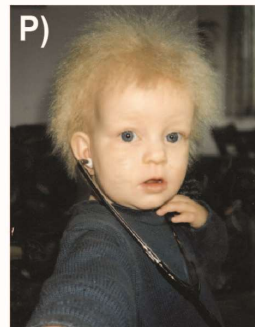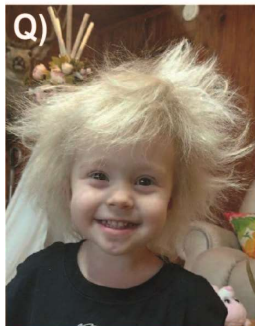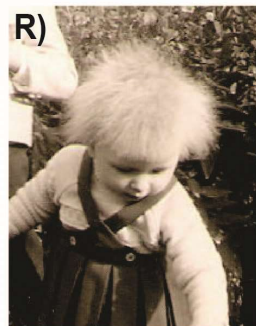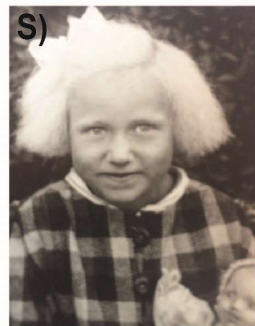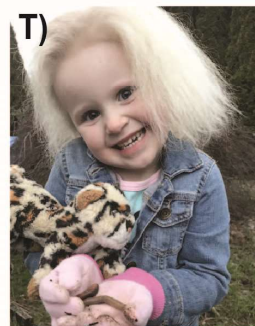

## eFigure 1. Clinical manifestation of UHS in additional individuals and the respective underlying genotypes

Additional individuals with UHS carrying bi-allelic pathogenic variants in *PADI3*. Their respective genotypes are (a) c.335T>A (p.Leu112His) & c.881C>T (p.Ala294Val), (b) c.335T>A (p.Leu112His) homozygous, (c) c.335T>A (p.Leu112His) & c.881C>T (p.Ala294Val), (d) c.335T>A (p.Leu112His) & c.881C>T (p.Ala294Val), (e) c.335T>A (p.Leu112His) & c.881C>T (p.Ala294Val), (f) c.881C>T (p.Ala294Val) & c.505C>T (p.Gln169\*), (g) c.881C>T (p.Ala294Val) homozygous, (h) c.335T>A (p.Leu112His) & c.881C>T (p.Ala294Val), (i) c.335T>A (p.Leu112His) & c.881C>T (p.Ala294Val), (j) c.335T>A (p.Leu112His) & c.652G>A (p.Gly218Ser), (k) c.881C>T (p.Ala294Val) homozygous, (l) c.335T>A (p.Leu112His) & c.881C>T (p.Ala294Val), (m) c.335T>A (p.Leu112His) & c.881C>T (p.Ala294Val), (n) c.335T>A (p.Leu112His) & c.1813C>A (p.Pro605Thr), (o) c.881C>T (p.Ala294Val) homozygous, (p) c.881C>T (p.Ala294Val) homozygous, (q) c.335T>A (p.Leu112His) & c.652G>A (p.Gly218Ser), (r) c.505C>T (p.Gln169\*) homozygous, (s) c.335T>A (p.Leu112His) & c.881C>T (p.Ala294Val), (t) c.335T>A (p.Leu112His) & c.881C>T (p.Ala294Val).

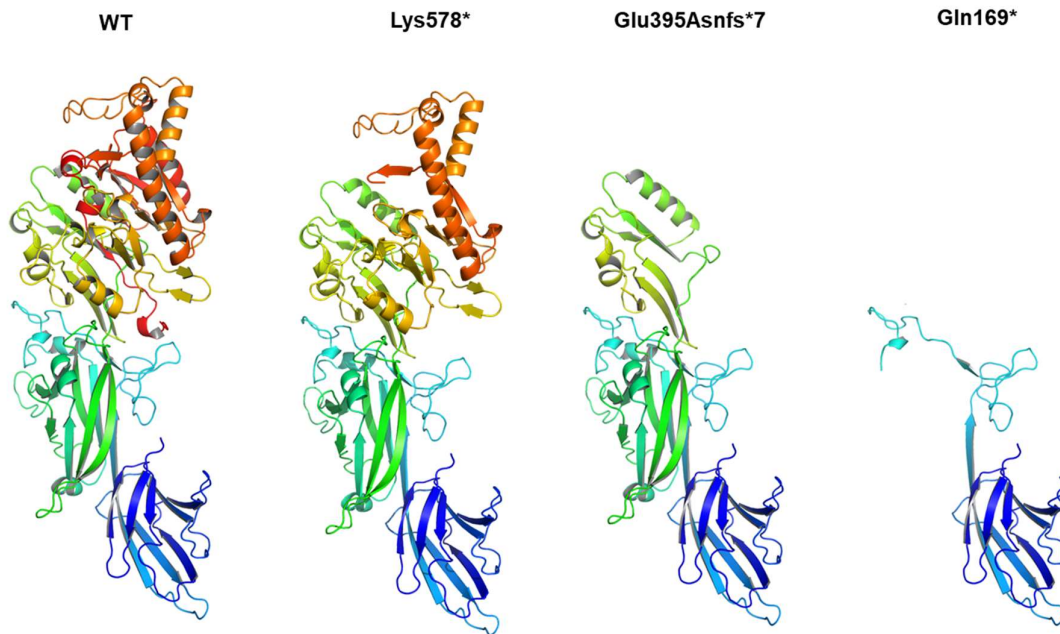

**eFigure 2. 3-Dimensional protein modeling of the pathogenic stop and frameshift variants identified in *PADI3***

The wild type protein (left) in comparison to the previously identified mutant Lys578\* and the newly identified mutant proteins Glu395Asnfs\*7 and Gln169\*, respectively. It should, however, be noted that the mutant proteins, particularly the latter two with earlier premature stop codons, may not be translated at all due to a nonsense mediated mRNA decay.

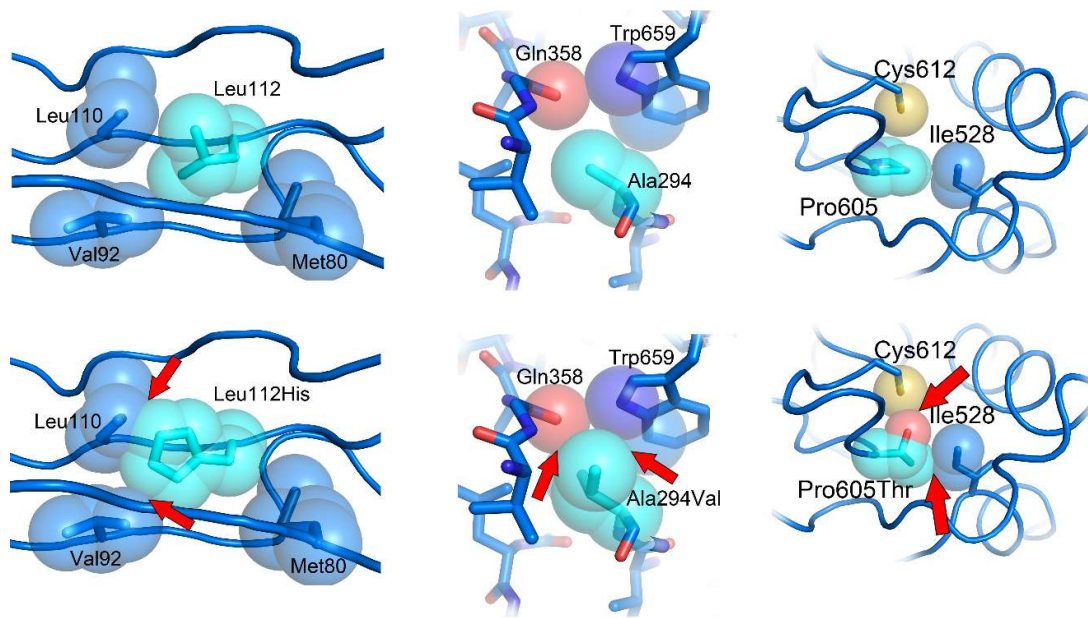

**eFigure 3. 3-Dimensional protein modeling of the three most common *PADI3* variants**

The top panel shows the wild type protein at the respective site of the substitution p.Leu112His (left), p.Ala294Val (middle) and p.Pro605Thr (right). The bottom panel shows the site of substitution in the respective mutant proteins.

A)

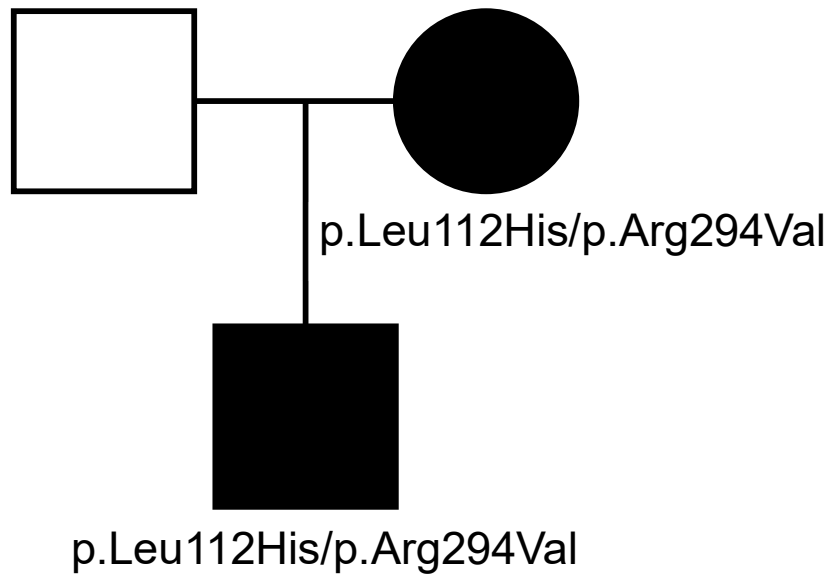

B)

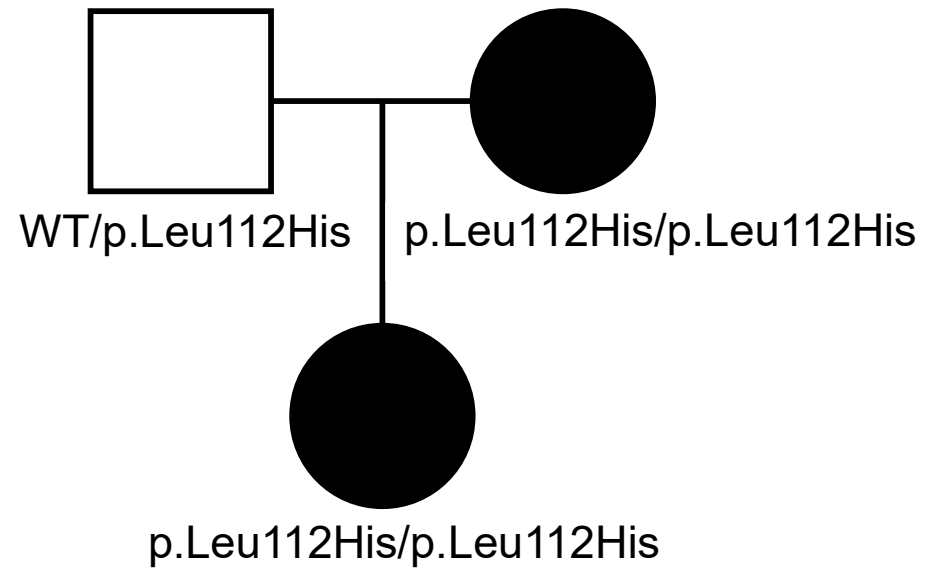

**eFigure 4. Genetic screening of two pedigrees suggesting an autosomal dominant inheritance**

Mutation analysis revealed in both of the cases that affected parents also carry two pathogenic *PADI3* variants.

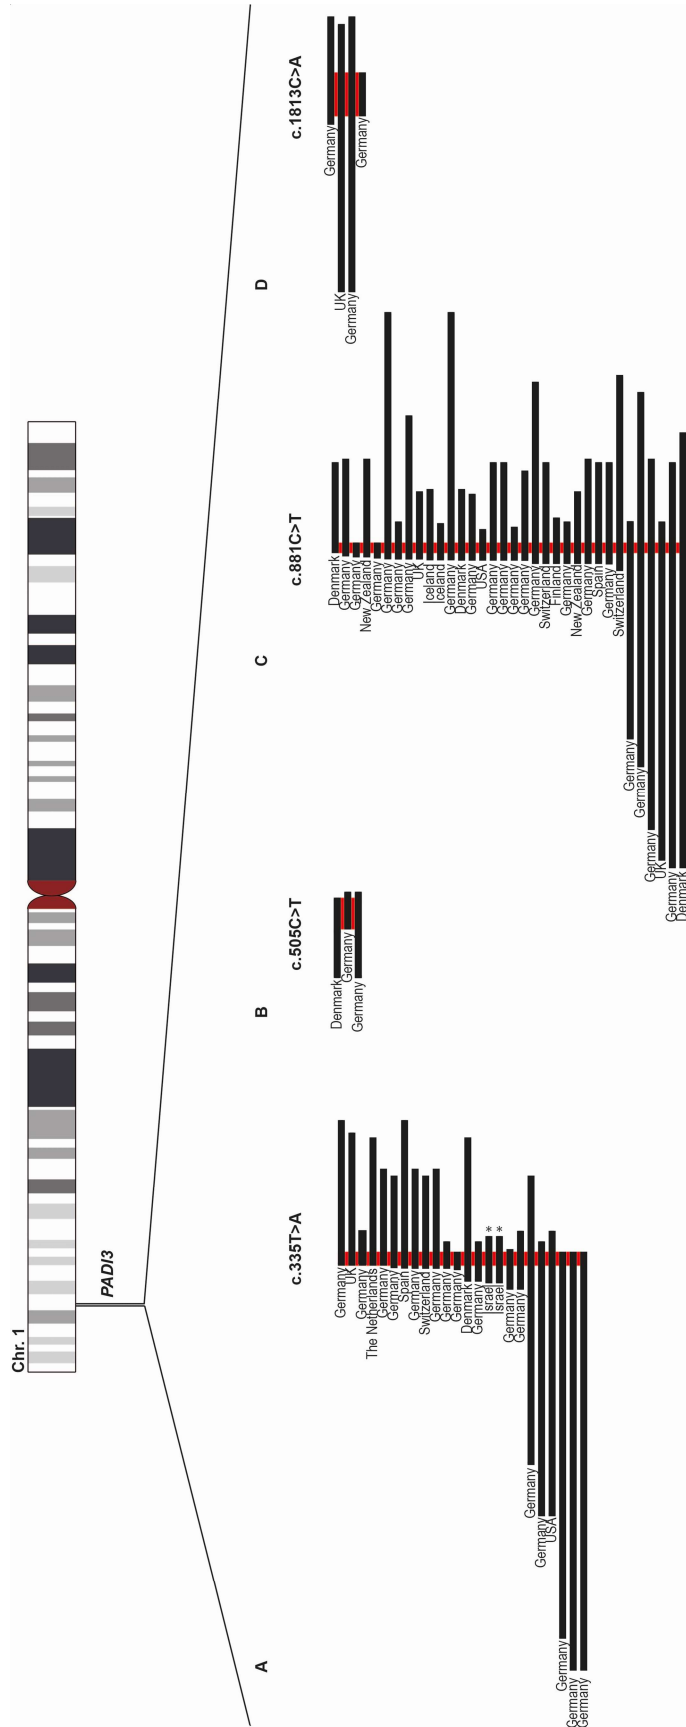

**eFigure 5. The variable extent of sharing across haplotypes carrying the respective *PADI3* pathogenic variants.**

The minimally shared regions across all haplotypes carrying a respective pathogenic variant are denoted with a dark red shade. \*These two haplotypes are from an individual born to consanguineous parents and are thus inherently representing the same



**eTable 1. Pathogenic *PADI3* variants underlying UHS**

| Variant                                  | Countries                                                                                                                                                                               | Minor allele frequency in gnomAD |
|------------------------------------------|-----------------------------------------------------------------------------------------------------------------------------------------------------------------------------------------|----------------------------------|
| <b>c.60_66delinsTGCTTGG (p.Gly22Trp)</b> | Germany (1)                                                                                                                                                                             | *                                |
| c.335T>A (p.Leu112His)                   | Ireland (1), Italy (1), Germany (28), Denmark (1), USA (6), UK (3), The Netherlands (2), Switzerland (1), Belgium (1), Slovenia (1), Portugal (1), Spain (1), Israel (1)                | 4.52e-3                          |
| <b>c.505C&gt;T (p.Gln169*)</b>           | Germany (1), Denmark (2)                                                                                                                                                                | 1.45e-4                          |
| <b>c.556C&gt;T (p.Arg186Trp)</b>         | Italy (1)                                                                                                                                                                               | 5.31e-5                          |
| <b>c.652G&gt;A (p.Gly218Ser)</b>         | Germany (1), USA (1)                                                                                                                                                                    | 2.83e-5                          |
| c.881C>T (p.Ala294Val)                   | Germany (31), New Zealand (1), Denmark (4), Finland (1), USA (5), Switzerland (3), Iceland (1), The Netherlands (1), UK (2), Chile (1), Belgium (1), Hungary (1), Norway (1), Spain (1) | 6.63e-3                          |
| <b>c.1114A&gt;G (p.Arg372Gly)</b>        | Chile (1)                                                                                                                                                                               | 1.19e-5                          |
| <b>c.1115G&gt;T (p.Arg372Met)</b>        | Ukraine (1)                                                                                                                                                                             | 7.79e-5                          |
| <b>c.1183del (p.Glu395Asnfs*7)</b>       | Germany (1)                                                                                                                                                                             | 4.00e-6                          |
| c.1732A>T (p.Lys578*)                    | Switzerland (1)                                                                                                                                                                         | -                                |
| c.1813C>A (p.Pro605Thr)                  | Germany (6), UK (1), Denmark (1)                                                                                                                                                        | 4.43e-4                          |
| <b>c.1868C&gt;T (p.Pro623Leu)</b>        | Finland (1)                                                                                                                                                                             | 3.29e-4                          |

The newly identified pathogenic variants since our previous report are depicted in bold. Note that the countries of individuals who carry two different variants are represented twice (e.g. only one individual from Chile participated in the study who carried c.881C>T (p.Ala294Val) and c.1114A>G (p.Arg372Gly)). Exception to this are individuals with parents of different countries of origin and for whom we could link the inheritance of the two mutations to the respective parent by genetic screening of the whole family (e.g. c.1115G>T (p.Arg372Met)).

\*c.60\_66delinsTGCTTGG (p.Gly22Trp) may also represent a rare haplotype composed of three single nucleotide variants, namely, rs1360902614, rs1221559173 and rs1344213588 which have been observed in the same single individual (minor allele frequency=6.5e-6) in gnomAD.

**eTable 2. The variable extent of sharing across individual haplotypes carrying c.505C>T (p.Gln169\*)**

| <b>Country</b> | <b>Start</b> | <b>End</b> | <b>Length</b> | <b>SNP Start</b> | <b>SNP End</b> |
|----------------|--------------|------------|---------------|------------------|----------------|
| Germany        | 17535399     | 17674847   | 139448        | rs57285689       | rs56698682     |
| Denmark        | 17342659     | 17651637   | 308978        | rs9435672        | rs13375202     |
| Germany        | 17342659     | 17674847   | 332188        | rs9435672        | rs56698682     |

The start and end positions are based on hg19.

**eTable 3. The variable extent of sharing across individual haplotypes carrying c.335T>A (p.Leu112His)**

| Country         | Start    | End      | Length  | SNP Start    | SNP End     |
|-----------------|----------|----------|---------|--------------|-------------|
| Germany         | 17490623 | 17640368 | 149746  | rs75362086   | rs35943476  |
| Germany         | 17459855 | 17610300 | 150446  | rs910223     | rs12135399  |
| Israel*         | 17484754 | 17660468 | 175715  | rs115806112  | rs34309058  |
| Israel*         | 17484754 | 17660468 | 175715  | rs115806112  | rs34309058  |
| Germany         | 17459855 | 17680807 | 220953  | rs910223     | rs3094881   |
| Germany         | 17542564 | 17896945 | 354382  | rs113564258  | rs72648415  |
| Switzerland     | 17540345 | 17896945 | 356601  | rs11203332   | rs72648415  |
| Germany         | 17552573 | 17923518 | 370946  | rs150923523  | rs12127699  |
| Germany         | 17540345 | 17923518 | 383174  | rs11203332   | rs12127699  |
| Germany         | 17540345 | 17923518 | 383174  | rs11203332   | rs12127699  |
| The Netherlands | 17552573 | 18043943 | 491371  | rs150923523  | rs4920625   |
| UK              | 17552573 | 18062545 | 509973  | rs150923523  | rs12407226  |
| Denmark         | 17490623 | 18043943 | 553321  | rs75362086   | rs4920625   |
| Germany         | 17552573 | 18110520 | 557948  | rs150923523  | rs112353530 |
| Spain           | 17541048 | 18110520 | 569473  | rs57174497   | rs112353530 |
| Germany         | 16588211 | 17640368 | 1052158 | rs183424675  | rs35943476  |
| USA             | 16588211 | 17680807 | 1092597 | rs183424675  | rs3094881   |
| Germany         | 16785463 | 17896945 | 1111483 | rs374130996- | rs72648415  |
| Germany         | 16115747 | 17600317 | 1484571 | rs2902164    | rs12037653  |
| Germany         | 15994251 | 17600317 | 1606067 | rs41270291   | rs12037653  |
| Germany         | 15994251 | 17600317 | 1606067 | rs41270291   | rs12037653  |

The start and end positions are based on hg19. \*These two haplotypes are from an individual born to consanguineous parents and are thus inherently representing the same information.

**eTable 4. The variable extent of sharing across individual haplotypes carrying c.881C>T (p.Ala294Val)**

| Country     | Start    | End      | Length  | SNP Start   | SNP End     |
|-------------|----------|----------|---------|-------------|-------------|
| Germany     | 17548261 | 17599930 | 51669   | rs12042325  | rs200523725 |
| Germany     | 17543844 | 17599930 | 56086   | rs74058987  | rs200523725 |
| USA         | 17535981 | 17651637 | 115656  | rs112338010 | rs13375202  |
| Germany     | 17535981 | 17660352 | 124371  | rs112338010 | rs78540609  |
| Iceland     | 17536952 | 17674847 | 137895  | rs2977272   | rs56698682  |
| Germany     | 17540345 | 17680807 | 140462  | rs11203332  | rs3094881   |
| Germany     | 17523367 | 17680807 | 157440  | rs115033991 | rs3094881   |
| Finland     | 17523367 | 17696338 | 172971  | rs115033991 | rs120483    |
| Germany     | 17535981 | 17787315 | 251334  | rs112338010 | rs113343434 |
| UK          | 17540345 | 17796711 | 256366  | rs11203332  | rs4284283   |
| Iceland     | 17536952 | 17805536 | 268584  | rs2977272   | rs147190895 |
| Denmark     | 17535981 | 17805536 | 269555  | rs112338010 | rs147190895 |
| New Zealand | 17523367 | 17796711 | 273344  | rs115033991 | rs4284283   |
| Germany     | 17535399 | 17876478 | 341079  | rs57285689  | rs77544322  |
| Denmark     | 17565110 | 17908963 | 343853  | rs747282761 | rs34984825  |
| Germany     | 17552573 | 17922259 | 369686  | rs150923523 | rs74059336  |
| Germany     | 17535981 | 17908963 | 372982  | rs112338010 | rs34984825  |
| Germany     | 17535981 | 17908963 | 372982  | rs112338010 | rs34984825  |
| New Zealand | 17548261 | 17922259 | 373998  | rs12042325  | rs74059336  |
| Spain       | 17523367 | 17908963 | 385596  | rs115033991 | rs34984825  |
| Switzerland | 17523367 | 17908963 | 385596  | rs115033991 | rs34984825  |
| Germany     | 17521274 | 17908963 | 387689  | rs3003469   | rs34984825  |
| Germany     | 17523367 | 17922259 | 398892  | rs115033991 | rs74059336  |
| Germany     | 17540345 | 18089348 | 549003  | rs11203332  | rs117069891 |
| Germany     | 17523367 | 18222257 | 698890  | rs10888012  | rs3094881   |
| Switzerland | 17495569 | 18247926 | 752357  | rs143218283 | rs2210811   |
| Germany     | 16848016 | 17682100 | 834084  | rs113723037 | rs1748012   |
| Germany     | 17541048 | 18489557 | 948509  | rs57174497  | rs74055922  |
| Germany     | 17536952 | 18489557 | 952605  | rs2977272   | rs74055922  |
| UK          | 16378219 | 17680807 | 1302588 | rs121909133 | rs3094881   |
| Germany     | 16495998 | 17922259 | 1426261 | rs924206    | rs74059336  |
| Germany     | 16741089 | 18183104 | 1442015 | rs114515972 | rs529557    |
| Germany     | 16349169 | 17908963 | 1559794 | rs202069202 | rs34984825  |
| Denmark     | 16349169 | 18023690 | 1674521 | rs202069201 | rs2270976   |

The start and end positions are based on hg19.

**eTable 5. The variable extent of sharing across individual haplotypes carrying c.1813C>A (p.Pro605Thr)**

| <b>Country</b> | <b>Start</b> | <b>End</b> | <b>Length</b> | <b>SNP Start</b> | <b>SNP End</b> |
|----------------|--------------|------------|---------------|------------------|----------------|
| Germany        | 17523367     | 17685905   | 162538        | rs115033991      | rs150221181    |
| Germany        | 17490623     | 17900974   | 410351        | rs75362086       | rs7516512      |
| UK             | 16848016     | 17871837   | 1023821       | rs113723037      | rs75174468     |
| Germany        | 16848016     | 17900974   | 1052958       | rs113723037      | rs7516512      |

The start and end positions are based on hg19.

## eReferences

1. McKenna A, Hanna M, Banks E, et al. The Genome Analysis Toolkit: a MapReduce framework for analyzing next-generation DNA sequencing data. *Genome Res.* 2010;20(9):1297-1303. doi:10.1101/gr.107524.110
2. Li H, Handsaker B, Wysoker A, et al. The Sequence Alignment/Map format and SAMtools. *Bioinformatics.* 15 2009;25(16):2078-2079. doi:10.1093/bioinformatics/btp352
3. Rimmer A, Phan H, Mathieson I, et al. Integrating mapping-, assembly- and haplotype-based approaches for calling variants in clinical sequencing applications. *Nat Genet.* 2014;46(8):912-918. doi:10.1038/ng.3036
4. Lek M, Karczewski KJ, Minikel EV, et al. Analysis of protein-coding genetic variation in 60,706 humans. *Nature.* 18 2016;536(7616):285-291. doi:10.1038/nature19057
5. Loh PR, Danecek P, Palamara PF, et al. Reference-based phasing using the Haplotype Reference Consortium panel. *Nat Genet.* 2016;48(11):1443-1448. doi:10.1038/ng.3679
6. Auton A, Brooks LD, Durbin RM, et al. A global reference for human genetic variation. *Nature.* 2015;526(7571):68-74. doi:10.1038/nature15393
